# Supplementary material
Source: PubMed Central journal article supplement (PMC3034735)

## Appendix 1

There were major changes in the HRS sample during the 1998 survey year. First, the HRS original survey was merged with the study of “Assets and Health Dynamics Among the Oldest Old (AHEAD)”. Second, HRS also added "War Baby (WB)" and "Children of the Depression Age (CODA)" samples. In sum, HRS 1998 Core sample (N=21,380) is composed of :

- i) HRS original (Cohort=born in 1931 - 1941, N=10,865 in 1998)
- ii) AHEAD (Cohort=born in 1914 - 1923, N=6,947 in 1998)
- iii) WB (Cohort=born in 1942- 1947, N=2,320 in 1998)
- iv) CODA (Cohort=1924 - 1930, N=2,529 in 1998)

As presented in Figure 1, sample size and age distribution were improved substantially in 1998.

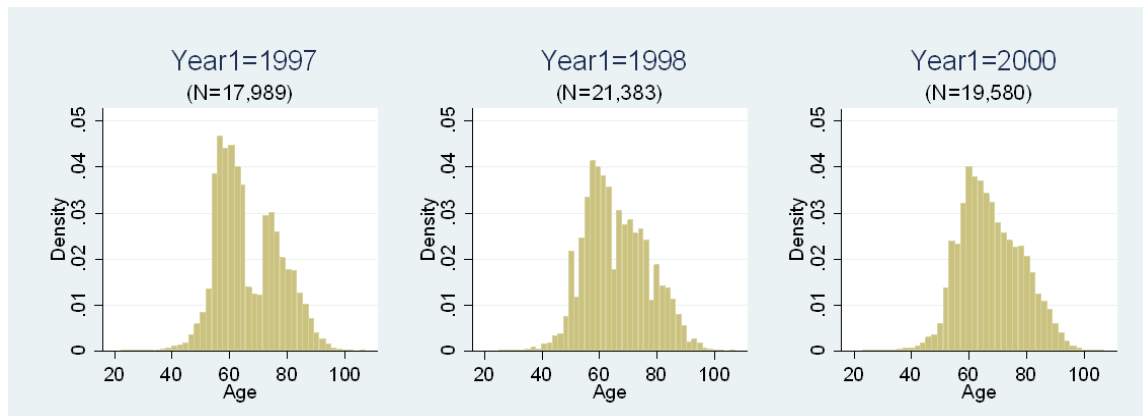

Supplement: NIHMS262571-supplement-Appendix_1.pdf [file NIHMS262571-supplement-Appendix_1.pdf]
