# Supplementary material
Source: PubMed Central journal article supplement (PMC3034735)
Supplement: NIHMS262571-supplement-Appendix_2.pdf [file NIHMS262571-supplement-Appendix_2.pdf]

## Appendix 2

Baseline Year Sample Summary by Lost to Follow-up (N=6,353)

| Variable                 | No Missing,<br>2000 - 2006<br>(N=5,382) |        | Any Missing,<br>2000 - 2006<br>(N=971) |        | P-value |
|--------------------------|-----------------------------------------|--------|----------------------------------------|--------|---------|
| Medication Restriction   |                                         |        |                                        |        | 0.353   |
| Not Restricted           | 4905                                    | (90.9) | 897                                    | (92.2) |         |
| Restricted               | 477                                     | (9.1)  | 74                                     | (7.8)  |         |
| Age                      |                                         |        |                                        |        | 0.292   |
| ≤ 64                     | 2024                                    | (39.6) | 373                                    | (40.8) |         |
| 65 – 74                  | 1836                                    | (34.0) | 340                                    | (35.3) |         |
| 75 – 84                  | 1522                                    | (26.5) | 258                                    | (23.9) |         |
| Gender                   |                                         |        |                                        |        | 0.455   |
| Men                      | 2655                                    | (50.2) | 467                                    | (51.5) |         |
| Women                    | 2727                                    | (49.8) | 504                                    | (48.6) |         |
| Race                     |                                         |        |                                        |        | <.001   |
| White                    | 4295                                    | (85.4) | 736                                    | (80.7) |         |
| Black                    | 895                                     | (10.9) | 184                                    | (13.8) |         |
| Other                    | 192                                     | (3.6)  | 51                                     | (5.5)  |         |
| Living Arrangement       |                                         |        |                                        |        | 0.716   |
| Married                  | 3356                                    | (61.4) | 611                                    | (60.4) |         |
| Unmarried living w/other | 716                                     | (14.0) | 115                                    | (13.5) |         |
| Unmarried living         | 1310                                    | (24.7) | 245                                    | (26.2) |         |
| Education (year)         |                                         |        |                                        |        | 0.996   |
| < 12                     | 2010                                    | (33.8) | 359                                    | (33.8) |         |
| 12                       | 1753                                    | (33.2) | 316                                    | (33.1) |         |
| > 12                     | 1619                                    | (33.0) | 296                                    | (33.2) |         |
| Net worth                |                                         |        |                                        |        | 0.447   |
| ≤ 42900                  | 1788                                    | (31.3) | 320                                    | (32.1) |         |
| 42,901 – 129,000         | 1401                                    | (26.0) | 257                                    | (26.3) |         |
| 129,001 – 310,900        | 1112                                    | (21.4) | 212                                    | (23.1) |         |
| ≥ 310,901                | 1081                                    | (21.4) | 182                                    | (18.6) |         |
| Number of Comorbidities  |                                         |        |                                        |        | 0.759   |
| 1                        | 3929                                    | (74.3) | 724                                    | (75.5) |         |
| 2                        | 1090                                    | (19.4) | 194                                    | (18.7) |         |
| ≥ 3                      | 363                                     | (6.4)  | 53                                     | (5.8)  |         |
| Psychiatric Problem      |                                         |        |                                        |        | 0.338   |
| No                       | 4327                                    | (81.5) | 779                                    | (79.9) |         |

|                             |      |        |     |        |       |
|-----------------------------|------|--------|-----|--------|-------|
| Yes                         | 1055 | (18.5) | 192 | (20.1) | 0.878 |
| Self Reported Health Status |      |        |     |        |       |
| Excellent                   | 150  | (3.2)  | 23  | (2.6)  |       |
| Very good                   | 719  | (14.3) | 128 | (14.3) |       |
| Good                        | 1632 | (31.1) | 305 | (31.5) |       |
| Fair                        | 1681 | (30.7) | 327 | (31.5) |       |
| Poor                        | 1200 | (20.7) | 188 | (20.1) |       |

---

*Note:* Proportions in parenthesis are obtained from weighted analysis. P-value is from testing Pearson chi-squared statistic.
