# Supplementary material
Source: PubMed Central journal article supplement (PMC3034735)
Supplement: NIHMS262571-supplement-Appendix_3.pdf [file NIHMS262571-supplement-Appendix_3.pdf]

### **Appendix 3**

Even if we use death as another category of outcomes, we still have missing subjects associated with death because missing values occur in the variable of medication restriction: If subjects die in year T (prior to interview point in year T), those subjects will be dropped out of analysis sample in year T and subsequent years due to missing values in medication restriction.

If we restrict the sample to those with only non-missing values in baseline covariates (age, gender, race, living arrangement, education, net wealth and self-reported health status in 1998), we have 25,476. With additional non-missing restrictions for the cost-related medication underuse variable, we have 20,745. Finally, having additional restrictions of non-missing values in outcome variables, we have 19,726. The below figure presents the distribution of outcomes by year (year 2000-2006).

Sample Distribution of Outcome Variable in Year T+1  
 - Using Final Sample -

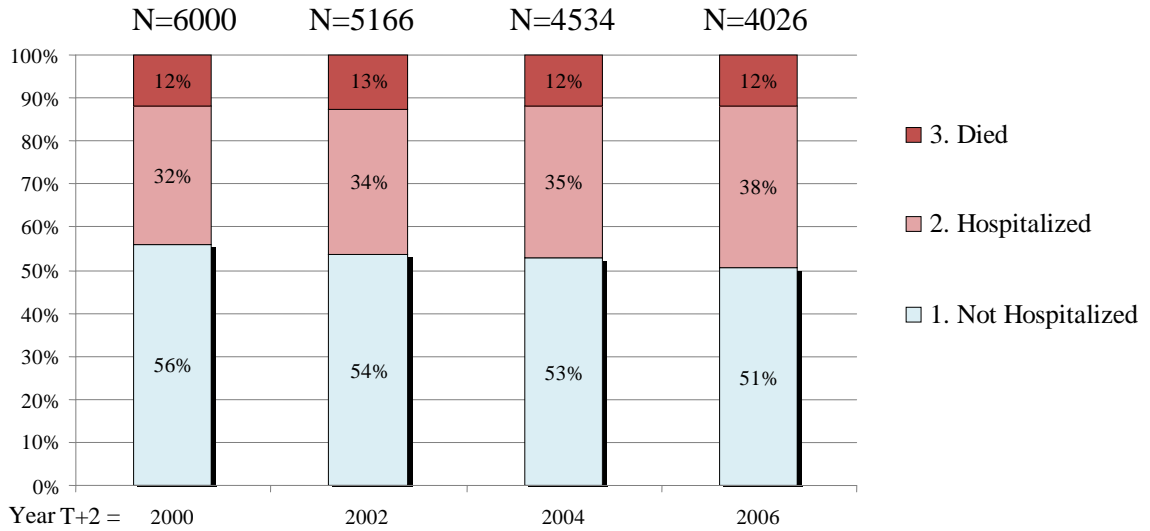

Baseline Restriction: Age 51-85 in 1998  
 : At least one cardiovascular disease in 1998 survey period  
 : Restrict to those alive in Year T

| Number of Observations with Additional Non-missing Restriction |                             |                             |                          |
|----------------------------------------------------------------|-----------------------------|-----------------------------|--------------------------|
| Year T=                                                        | Covariates of baseline year | Medication restriction in T | Outcome variables in T+2 |
| 1998                                                           | 6369                        | 6364                        | 6000                     |
| 2000                                                           | 6369                        | 5424                        | 5166                     |
| 2002                                                           | 6369                        | 4761                        | 4534                     |
| 2004                                                           | 6369                        | 4196                        | 4026                     |
| Total                                                          | 25,476                      | 20,745                      | 19,726                   |
